# Supplementary material
Source: HighWire-hosted journal article supplement (https://erj.ersjournals.com/content/61/1/2201217)

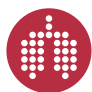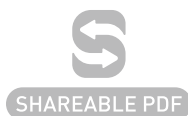

# Living without eosinophils: evidence from mouse and man

David J. Jackson<sup>1,2</sup> and Ian D. Pavord<sup>3</sup>

<sup>1</sup>Guy's Severe Asthma Centre, Guy's and St Thomas' NHS Foundation Trust, London, UK. <sup>2</sup>School of Immunology and Microbial Sciences, King's College London, London, UK. <sup>3</sup>Respiratory Medicine Unit and Oxford Respiratory NIHR BRC, University of Oxford, Oxford, UK.

Corresponding author: David J. Jackson ([David.Jackson@gstt.nhs.uk](mailto:David.Jackson@gstt.nhs.uk))

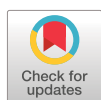

Shareable abstract (@ERSpublications)

**This review of accumulated evidence for eosinophil depletion in mouse models and human clinical trials affirms that targeting eosinophils to treat eosinophil-associated diseases has therapeutic value without detrimental effects on health** <https://bit.ly/3biObDI>

**Cite this article as:** Jackson DJ, Pavord ID. Living without eosinophils: evidence from mouse and man. *Eur Respir J* 2023; 61: 2201217 [DOI: 10.1183/13993003.01217-2022].

This single-page version can be shared freely online.

Copyright ©The authors 2023.

This version is distributed under the terms of the Creative Commons Attribution Non-Commercial Licence 4.0. For commercial reproduction rights and permissions contact [permissions@ersnet.org](mailto:permissions@ersnet.org)

Received: 16 June 2022

Accepted: 25 July 2022

## Abstract

The enduring view of eosinophils, as immune effector cells whose primary function is host defence against infection by helminths and other microbial pathogens, sets the stage for a fundamental question regarding the safety of therapeutic eosinophil depletion. If eosinophils are significantly reduced or altogether depleted in an effort to alleviate the negative effects of tissue eosinophilia and eosinophilic inflammation in conditions such as asthma, COPD, chronic rhinosinusitis with nasal polyps, eosinophilic granulomatosis with polyangiitis and hypereosinophilic syndrome, would these patients become susceptible to infection or another illness? Development of mouse models in which the eosinophil lineage has been ablated, observations in patients naturally lacking eosinophils and data from studies of eosinophil-depleting medical therapies indicate that the absence of eosinophils is not detrimental to health. The evidence available to date, as presented in this review, supports the conclusion that even if certain homeostatic roles for the eosinophil may be demonstrable in controlled animal models and human *in vitro* settings, the evolution of the human species appears to have provided sufficient immune redundancy such that one may be hale and hearty without eosinophils.

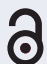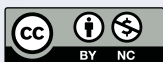

Supplement: inline-supplementary-material-1 [file inline-supplementary-material-1.pdf]
